# Supplementary material for: Self-host homoleptic green iridium dendrimers based on diphenylamine dendrons for highly efficient single-layer PhOLEDs
Source: Royal Society of Chemistry journal article supplement (doi:10.1039/c3tc32024c), 2013-11-11
Supplement: c3tc32024c.pdf [file c3tc32024c.pdf]

## Electronic Supplementary Information (ESI)

### Self-host homoleptic green iridium dendrimers based on diphenylamine dendrons for highly efficient single-layer PhOLEDs

Wenwen Tian<sup>†</sup>, Chang Yi<sup>†</sup>, Bo Song<sup>†</sup>, Qi Qi<sup>†,‡</sup>, Wei Jiang<sup>†,\*</sup>, Yingping Zheng<sup>†</sup>, Zhengjian Qi<sup>†</sup>, Yueming Sun<sup>†,‡,\*</sup>

<sup>†</sup> School of Chemistry and Chemical Engineering, Southeast University, Nanjing, Jiangsu, P. R. China 211189

<sup>‡</sup> State Key Lab of Silicon Materials, Zhejiang University, Hangzhou, Zhejiang, P. R. China 310027

\* Corresponding author: 101011462@seu.edu.cn (W. Jiang), sun@seu.edu.cn (YM. Sun).

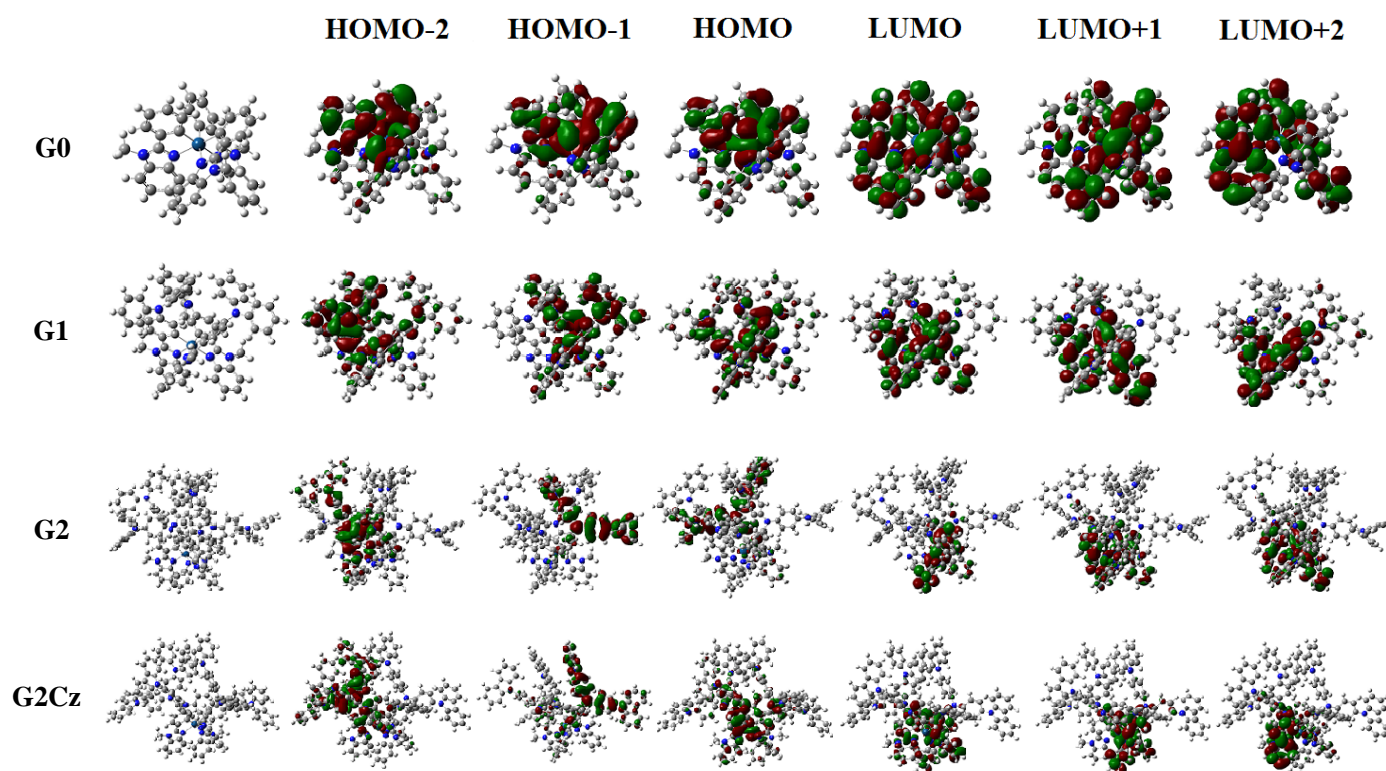

Fig. S1 Selected frontier orbitals for the complexes.
